# Supplementary material
Source: PubMed Central journal article supplement (PMC3151090)
Supplement: supp_M111.254037_jbc.M111.254037-1.pdf [file supp_M111.254037_jbc.M111.254037-1.pdf]

**Supplemental Data to**

***CAENORHABDITIS ELEGANS* EVOLVES A NEW ARCHITECTURE FOR THE MULTI-AMINOACYL-tRNA SYNTHETASE COMPLEX.**

**Svitlana Havrylenko<sup>1,2</sup>, Renaud Legouis<sup>3</sup>, Boris Negrutskii<sup>2</sup>, and Marc Mirande<sup>1</sup>**

Supplemental Table 1, and Figures S1-S2

**Supplemental Table 1**

| <b>Transgenic strains generated in this study</b> |                                                                                    |
|---------------------------------------------------|------------------------------------------------------------------------------------|
| <b>Name</b>                                       | <b>Genotype</b>                                                                    |
| RD125                                             | <i>unc119(ed3); Is[unc119(+); pprs-1::ProRS-Ce::TAP]</i>                           |
| RD126                                             | <i>unc119(ed3); Is[unc119(+); pmrs-1::MetRS<math>\Delta</math>C-Ce::HA]</i>        |
| RD159                                             | <i>unc119(ed3); Is[unc119(+); peft-3::MetRS<math>\Delta</math>C-Ce::HA]</i>        |
| RD160                                             | <i>unc119(ed3); Is[unc119(+); peft-3::MetRS<math>\Delta</math>CC-Ce::Cp43::HA]</i> |
| RD168                                             | <i>unc119(ed3); Is[unc119(+); peft-3::MetRS<math>\Delta</math>NC-Ce::C-Ce]</i>     |
| RD169                                             | <i>unc119(ed3); Is[unc119(+); peft-3::MetRS<math>\Delta</math>NC-Ce::Np43]</i>     |

| <b>Plasmids used in this study</b> |                        |                               |                        |
|------------------------------------|------------------------|-------------------------------|------------------------|
| <b>Name</b>                        | <b>Vector backbone</b> | <b>Insert</b>                 | <b>Reference</b>       |
| pME18S-FL3                         |                        | <i>mrs-1</i> cDNA (YK1416a08) | Y. Kohara              |
| pDONR201                           |                        |                               | Invitrogen             |
| pSB_GW::TAG                        |                        |                               | Polanowska et al. 2004 |
| pSB_GW::TAP                        | pSB_GW::TAG            | TAP cassette                  | This study             |
|                                    | pEGFP-N1               | p43-Hs cDNA                   | Shalak et al. 2007     |
|                                    | pUC18                  | MetRS-Hs cDNA                 | Kaminska et al. 2001   |

| <b>Expression vectors</b>     |                        |                                                                                 |                  |
|-------------------------------|------------------------|---------------------------------------------------------------------------------|------------------|
| <b>Name</b>                   | <b>Vector backbone</b> | <b>Insert</b>                                                                   | <b>Reference</b> |
| pSB_PRS-Ce_TAP                | pSB_GW::TAP            | <i>pprs-1::prs-1</i>                                                            | This study       |
| pSB_MRS $\Delta$ C-Ce         | pSB_GW::TAG            | <i>pmrs-1::mrs-1<math>\Delta</math>(596-917)::HA</i>                            | This study       |
| pSB_eMRS $\Delta$ C-Ce        | pSB_GW::TAG            | <i>peft-3::mrs-1<math>\Delta</math>(596-917)::HA</i>                            | This study       |
| pSB_eMRS $\Delta$ CC-Ce:Cp43  | pSB_GW::TAG            | <i>peft-3::mrs-1<math>\Delta</math>(750-917)::p43-Hs(147-312)::HA</i>           | This study       |
| pSB_eMRS $\Delta$ NC-Ce:Np43  | pSB_GW::TAG            | <i>peft-3::mrs-1<math>\Delta</math>(596-917)::p43-Hs(1-144)::mrs-1(750-917)</i> | This study       |
| pSB_eMRS $\Delta$ NC-Ce::C-Ce | pSB_GW::TAG            | <i>peft-3::MetRS-Hs(215-823)::mrs-1(596-917)</i>                                | This study       |

| <b>RNAi vectors</b> |                        |                                     |                          |
|---------------------|------------------------|-------------------------------------|--------------------------|
| <b>Name</b>         | <b>Vector backbone</b> | <b>Insert</b>                       | <b>Reference</b>         |
| L4440               |                        |                                     | Timmons et al. 2001      |
| L4440               |                        | CAT (WBRNAi00008897)                | Kamath and Ahringer 2003 |
| L4440               |                        | C (1876-2769nt <i>mrs-1</i> mRNA)   | This study               |
| L4440               |                        | NC (1876-2265 nt <i>mrs-1</i> mRNA) | This study               |
| L4440               |                        | CC (2278-2769 nt <i>mrs-1</i> mRNA) | This study               |

## Supplemental Data

Supplemental Table 1, and Figures S1-S2

### Legends to Supplementary Figures

**Figure S1.** Expression of the mutant allele *mrsp-38(ok2139)*. The 1252 nt deletion encompasses the 3'-end of *mrsp-38* and the 5'-end of *dcap-1*. Total mRNA was isolated from the mutant strain and RT-PCR was performed between oligonucleotides 01 and 02 to assess that mRNA is expressed (RT-PCR product of 359 bp expected), and between oligonucleotides 01 and 03 to check whether the remaining part of exon III from *dcap-1* is spliced or not. If exon III' would be spliced, the size of the RT-PCR product obtained with oligonucleotides 01 et 03 would be of 469 bp, instead of 774 bp if this exon is present in mRNA. RT-PCR products were analyzed on an agarose gel. Exon III' is not spliced, and the first stop codon in frame with the ATG of *mrsp-38* is located near the 5'-end of this exon. M: size marker.

**Figure S2.** Expression of ectopic MetRS in the transgenic worms. Extracts from wild-type strain (WT) and from transgenic worms expressing MetRS $\Delta$ C-Ce (RD159), MetRS $\Delta$ CC-Ce::Cp43 (RD160) or MetRS $\Delta$ NC-Ce::Np43 (RD169) were analyzed by immunoblotting with anti-MetRS $\Delta$ C-Ce and anti-tubulin antibodies.

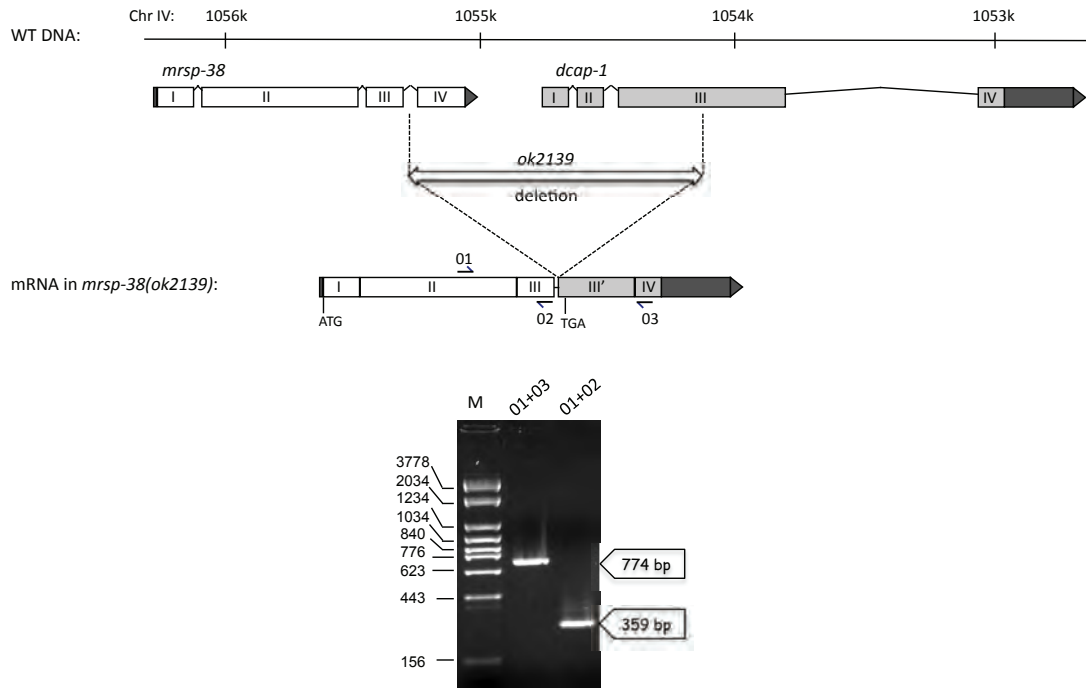

Fig. S1

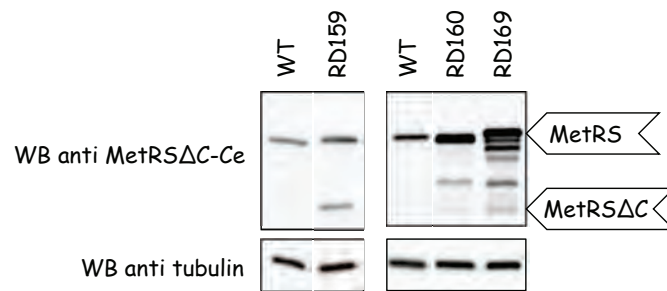

Fig. S2
